# Supplementary material
Source: publisher figshare collection journal article supplement (https://acs.figshare.com/ndownloader/files/8153861)
Supplement: Supplementary file 1 [file 8153861]

## Supporting Information

# H-aggregates Granting Crystallization Induced Emissive Behavior and Ultralong Phosphorescence from a Pure Organic Molecule

*Elena Lucenti,<sup>a</sup> Alessandra Forni,<sup>a</sup> Chiara Botta,<sup>b</sup> Lucia Carlucci,<sup>c</sup> Clelia Giannini,<sup>c</sup> Daniele Marinotto,<sup>c</sup> Andrea Previtali,<sup>c</sup> Stefania Righetto<sup>c</sup> and Elena Cariati<sup>c,\*</sup>*

a) ISTM-CNR, Istituto di Scienze e Tecnologie Molecolari – Consiglio Nazionale delle  
Ricerche and INSTM UdR, via Golgi 19, 20133 Milano, Italy.,

b) ISMAC-CNR, Istituto per lo Studio delle Macromolecole - Consiglio Nazionale delle  
Ricerche and INSTM UdR, Via Corti 12, 20133 Milano, Italy.

c) Department of Chemistry, Università degli Studi di Milano and INSTM UdR, via Golgi 19,  
20133 Milano, Italy.

### Experimental Details

**Luminescence measurements.** Photoluminescence quantum yields were measured using a C11347 Quantaaurus – Absolute Photoluminescence Quantum Yield Spectrometer (Hamamatsu Photonics K.K), equipped with a 150 W Xenon lamp, an integrating sphere and a multichannel detector. Steady state emission and excitation spectra and photoluminescence lifetimes were obtained using a FLS 980 spectrofluorimeter (Edinburg Instrument Ltd). The steady state measurements were obtained by a 450 W Xenon arc lamp. Photoluminescence lifetime measurements were performed

using: Edinburgh Picosecond Pulsed Diode Laser EPL-375, EPLED-300, (Edinburg Instrument Ltd) and microsecond flash Xe- lamp (60W, 0.1÷100 Hz) with data acquisition devices time correlated single-photon counting (TCSPC) and multi-channel scaling (MCS) methods, respectively.

## DFT and TDDFT calculations

DFT and TDDFT calculations on compounds **1** and **2** were performed with Gaussian 09 program (Revision D.01), using the 6-311++G(d,p) basis set. Owing to the observed multi-faceted properties of **1**, a functional able to correctly treat ground and excited states properties, besides dispersive intermolecular interactions, was requested. Several DFT exchange-correlation functionals (PBE0, CAM-B3LYP, B97D and  $\omega$ B97X) have been tested in order to single out a functional able to properly reproduce in a consistent way the whole set of geometrical, electronic and optical features of the investigated dye **1**, in both monomeric and aggregates forms. On one side, the PBE0 functional was found to accurately reproduce the absorption spectrum of the monomer ( $S_0 \rightarrow S_3$  and  $S_0 \rightarrow S_4$  transitions computed at 226 nm with  $f=0.30$ , close to the experimental  $\lambda_{\max}$  value, 220 nm) but failed to provide a stable dimer. The same inability to obtain a convergence dimer was found by using the CAM-B3LYP functional. On the other side, the B97D functional, while providing stable dimers and larger aggregates, was found to be instable for TD calculations. Only the  $\omega$ B97X functional was shown to provide both acceptable absorption spectra for the monomer ( $S_0 \rightarrow S_3$  and  $S_0 \rightarrow S_4$  transitions computed at 203 nm with  $f=0.56$ ) and stable dimer and tetramer aggregates. The same functional was also able to provide a stationary state for the  $S_1$  singlet excited state of both monomer and dimer. Therefore, the latter functional was chosen for all ground and excited states calculations.

In Tables S1 and S2 we report the first singlet and triplet excitation energies for the monomer and the dimer at the respective ground state geometries. The difference between the  $S_1$  and  $T_1$  excitation energies corresponds to the ‘vertical’  $\Delta E_{ST}$  energy gap and provides only a first approximation to the experimentally observed singlet–triplet energy gap, owing to the neglecting of geometry relaxation that could arise in crystal structure. In fact, the computed  $\Delta E_{ST}$  was significantly larger than the experimental one (1.57 and 1.55 eV for the monomer and the dimer, respectively, to be compared with the observed value of about 0.7 eV). A better approximation should be provided by the ‘adiabatic’  $\Delta E_{ST}^*$  energy gap, which differently from  $\Delta E_{ST}$  takes into account excited-state geometry relaxations due to optimization of both  $S_1$  and  $T_1$  states, which is however hampered by the intrinsic difficulty in optimizing  $T_1$  at the TDDFT level. Besides the neglecting of geometry relaxation, moreover, it should be also taken into account that this data is strongly dependent on the adopted functional, owing to a significant shift of the triplet level with respect to the singlet one, which is instead rather stable with varying the functional. For example,  $\Delta E_{ST}$  reduces to 1.49 and 1.11 eV for the monomer when using CAM-B3LYP and M06-2X, respectively, on the optimized  $\omega$ B97X structures.

Calculations were performed on compounds **1** and **2** at the same level of theory, considering in both cases the monomer and the  $\pi$ - $\pi$  stacked dimer. For **2**, therefore, the simulated dimer does not represent a good model for the true aggregate form because water molecules, which are present in

the crystal structure of **2**, are not included in calculations owing to the complex network of intermolecular interactions that should be taken into account. At molecular level, the two compounds reveal very similar electronic and optical properties, though the electronic energy of **2** is higher (by 5.49 kcal/mol) than that of **1**, accounting for its formation as minority product during the preparation of **1**. The optimized dimeric forms of **1** and **2** are as well very similar, with a separation between centroids of the central six-membered rings slightly shorter in **1** (3.98 Å) with respect to that of **2** (4.31 Å), but equal interaction energy (-10.11 kcal/mol). However, while for **1** the inter-centroids separation was comparable with the X-ray values (3.73 and 3.95 Å, according to the dimer taken into consideration), in the case of **2** it was much shorter than the experimental value (4.65 Å), owing to the lack of water molecules in the simulated system. These results suggest a reduced  $\pi$ - $\pi$  stacking interaction in the crystal structure of **2** with respect to that predicted for **1**, in agreement with the observed differences in the emissive behavior of the two compounds in crystal phase.

If not otherwise specified, calculations have been performed in vacuo.

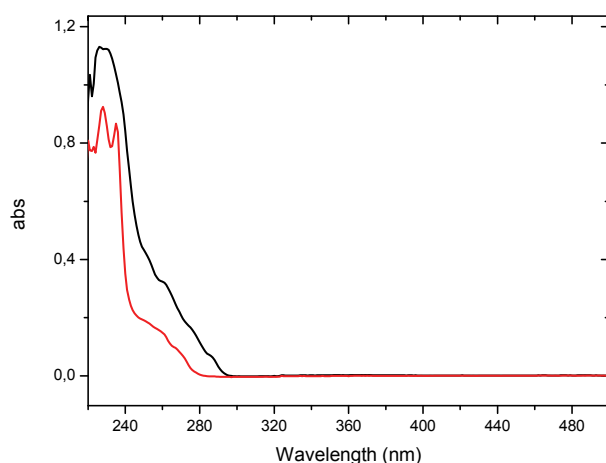

**Figure S1** Absorption spectra of **1** and **2** in DCM ( $2.5 \times 10^{-5}$  M) at 298 K, black line and red line, respectively.

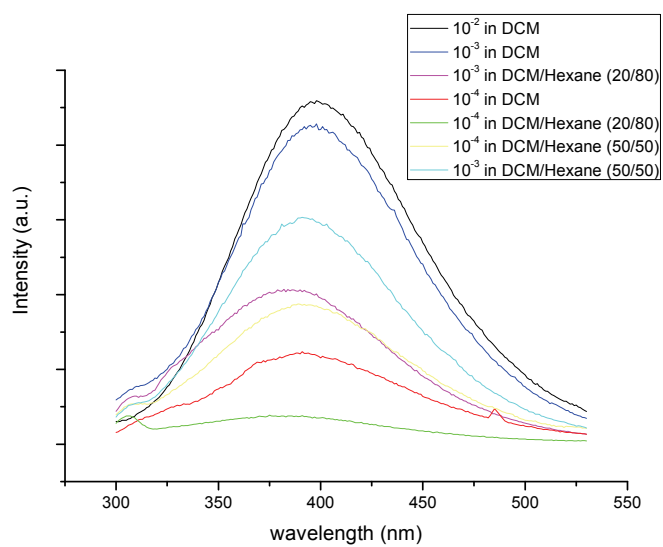

**Figure S2** Emission spectra of **1** in DCM-DCM/hexane (different concentrations) at 298 K.

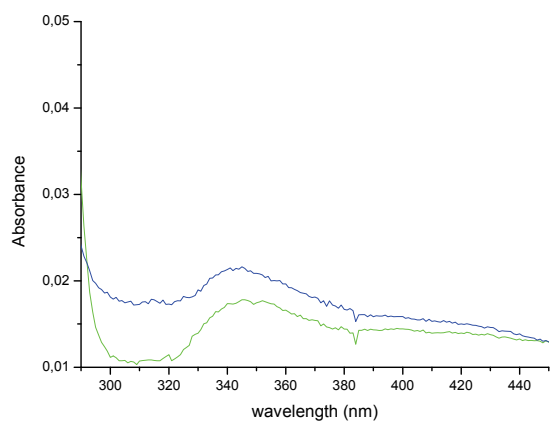

**Figure S3** Absorption spectra of **1** in DCM:  $10^{-2}$  M green line,  $10^{-3}$  M blue line.

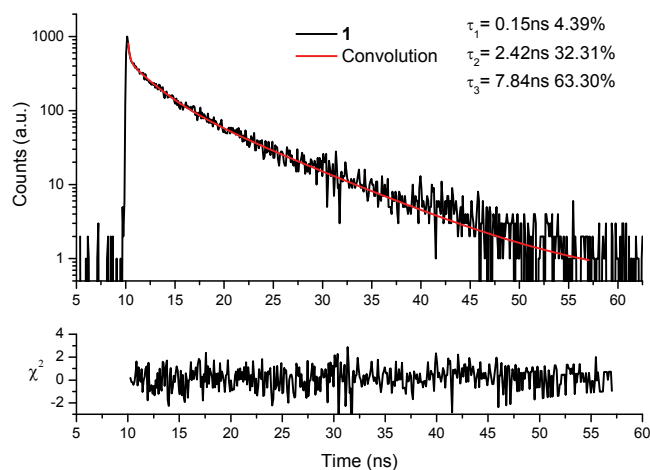

**Figure S4a** Fluorescence decay of **1** in DCM (1x10<sup>-2</sup>M) at 298 K, black line ( $\lambda_{\text{exc}}$  374 nm;  $\lambda_{\text{em}}$  420 nm) and convolution fit (red line). Weighted residuals ( $\chi^2$ ) are shown under the decay curves.

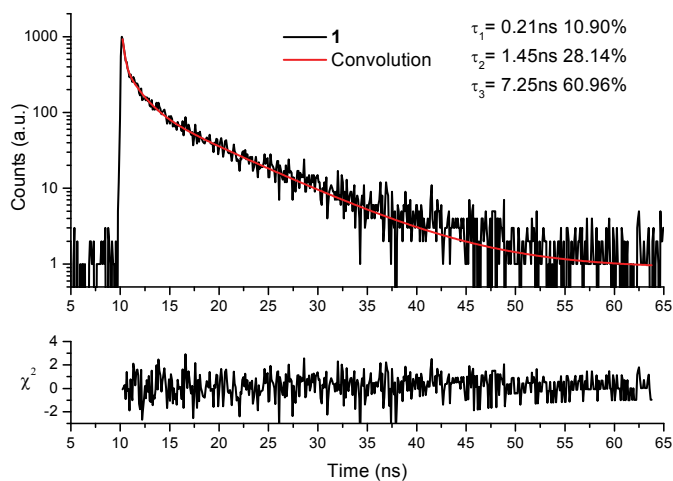

**Figure S4b** Fluorescence decay of **1** in DCM (1x10<sup>-2</sup>M) at 298 K, black line ( $\lambda_{\text{exc}}$  374 nm;  $\lambda_{\text{em}}$  570 nm) and convolution fit (red line). Weighted residuals ( $\chi^2$ ) are shown under the decay curves.

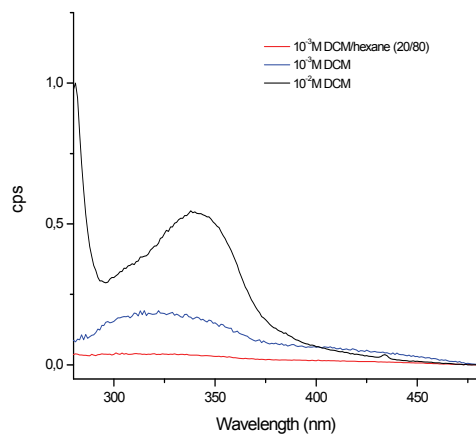

**Figure S5** Excitation spectra of **1** in DCM-DCM/hexane at different concentrations ( $\lambda_{\text{em}}$  500 nm)

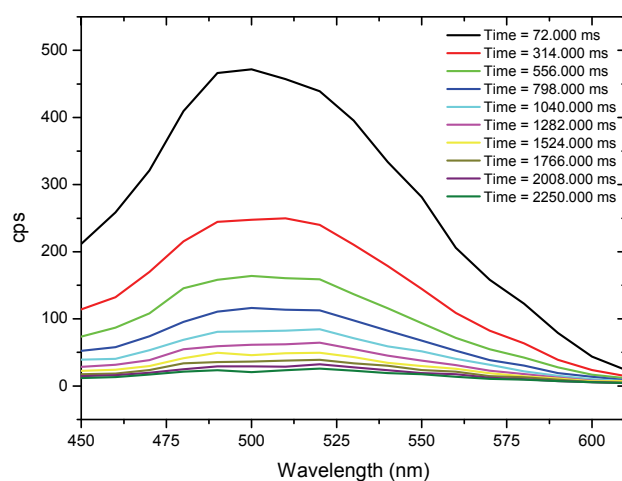

**Figure S6a** Emission spectra of **1** in DCM (1x10<sup>-2</sup>M) at 77 K recorded at different time delays ( $\lambda_{\text{exc}}$ =350 nm).

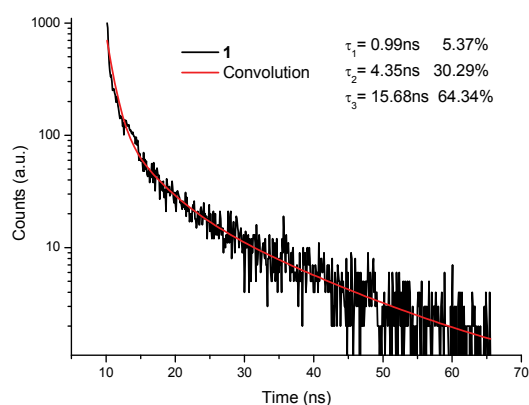

**Figure S6b** Fluorescence decay of **1** in DCM (1x10<sup>-2</sup>M) at 77 K, black line ( $\lambda_{\text{exc}}$  374 nm;  $\lambda_{\text{em}}$  450 nm) and convolution fit (red line).

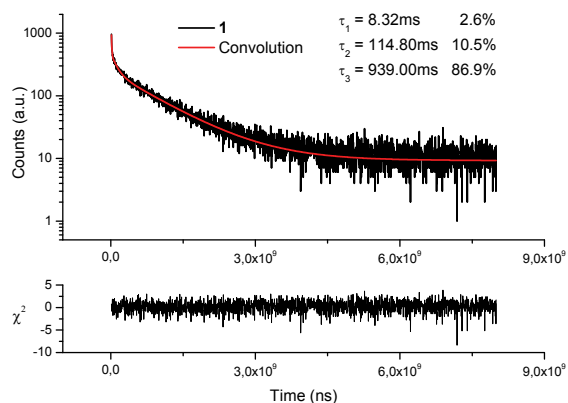

**Figure S6c** Fluorescence decay of **1** in DCM (1x10<sup>-2</sup>M) at 77 K, black line ( $\lambda_{\text{exc}}$  360 nm;  $\lambda_{\text{em}}$  570 nm) and convolution fit (red line). Weighted residuals ( $\chi^2$ ) are shown under the decay curves.

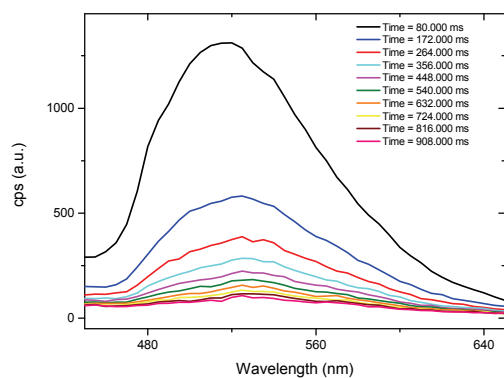

**Figure S7** Emission spectra of **1** (powder) at 298 K recorded at different time delays ( $\lambda_{\text{exc}} = 374$  nm).

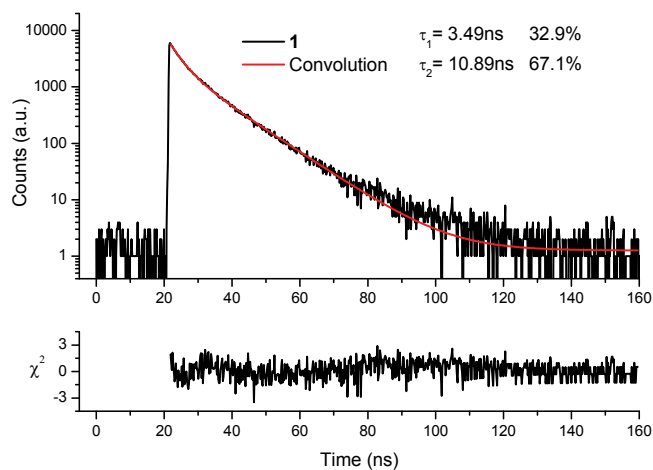

**Figure S8a** Fluorescence decay of **1** (powder) at 298 K, black line ( $\lambda_{\text{exc}} = 374$  nm;  $\lambda_{\text{em}} = 420$  nm) and convolution fit (red line). Weighted residuals ( $\chi^2$ ) are shown under the decay curves.

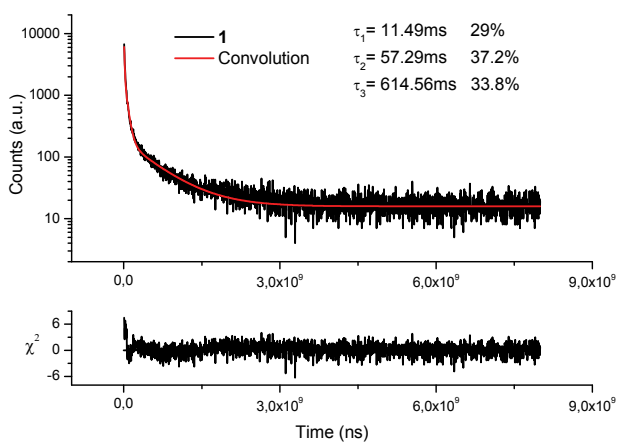

**Figure S8b** Fluorescence decay of **1** (powder) at 298 K, black line ( $\lambda_{\text{exc}} = 350$  nm;  $\lambda_{\text{em}} = 570$  nm) and convolution fit (red line). Weighted residuals ( $\chi^2$ ) are shown under the decay curves.

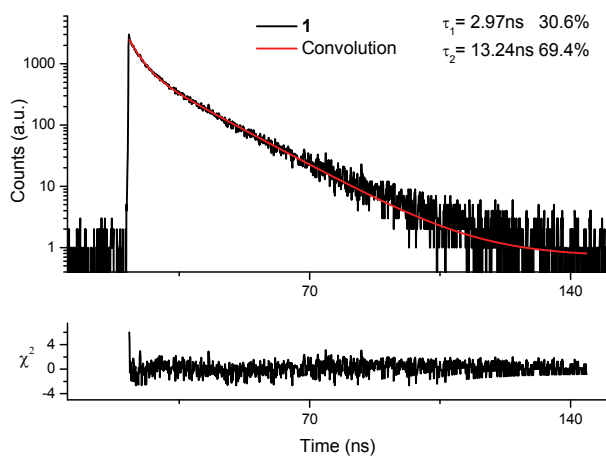

**Figure S9a** Fluorescence decay of **1** (powder) at 77 K, black line ( $\lambda_{\text{exc}}$  374 nm;  $\lambda_{\text{em}}$  420 nm) and convolution fit (red line). Weighted residuals ( $\chi^2$ ) are shown under the decay curves.

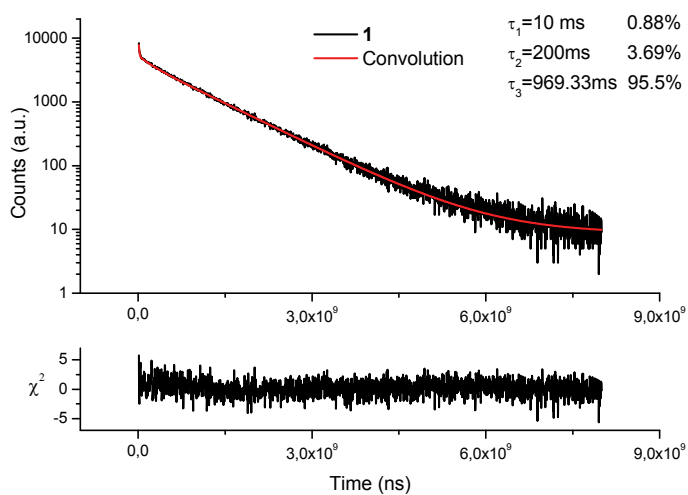

**Figure S9b** Fluorescence decay of **1** (powder) at 77 K, black line ( $\lambda_{\text{exc}}$  360 nm;  $\lambda_{\text{em}}$  540 nm) and convolution fit (red line). Weighted residuals ( $\chi^2$ ) are shown under the decay curves.



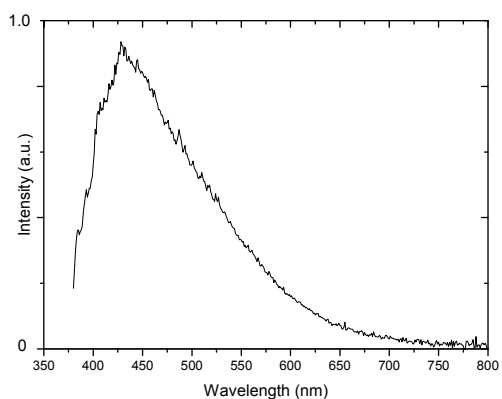

**Figure S10a** Emission spectrum of **1** (powder) at 77 K,  $\lambda_{\text{exc}}$  360 nm.

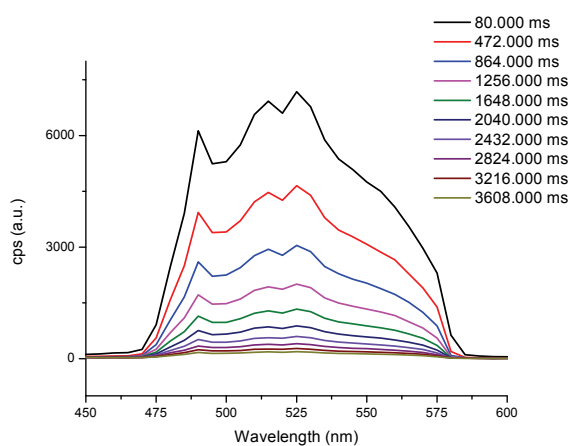

**Figure S10b** Emission spectra of **1** (powder) at 77 K recorded at different time delays ( $\lambda_{\text{exc}}$  = 374 nm)

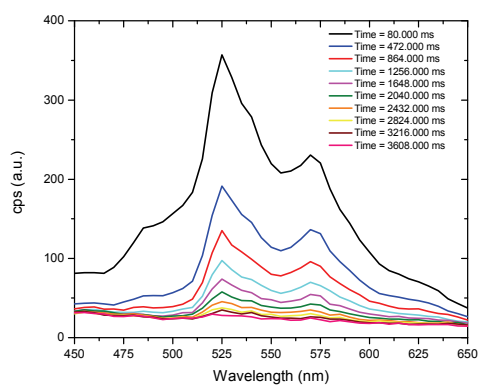

**Figure S11** Emission spectra of **1** (crystals) at 298 K recorded at different time delays ( $\lambda_{\text{exc}}$ =374 nm)

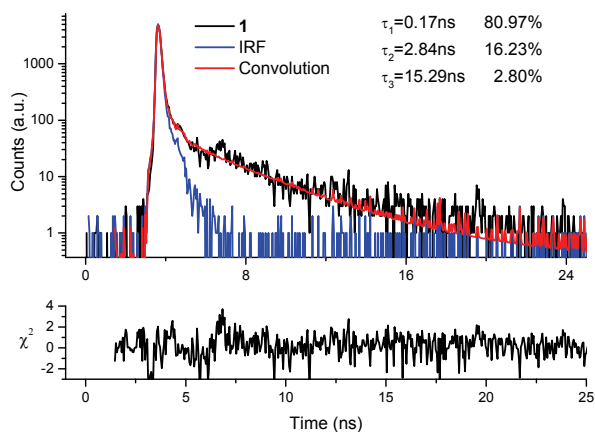

**Figure S12a** Fluorescence decay of **1** (crystals) at 298 K, black line ( $\lambda_{\text{exc}}$  360 nm;  $\lambda_{\text{em}}$  400 nm) and convolution fit (red line). Weighted residuals ( $\chi^2$ ) are shown under the decay curves.

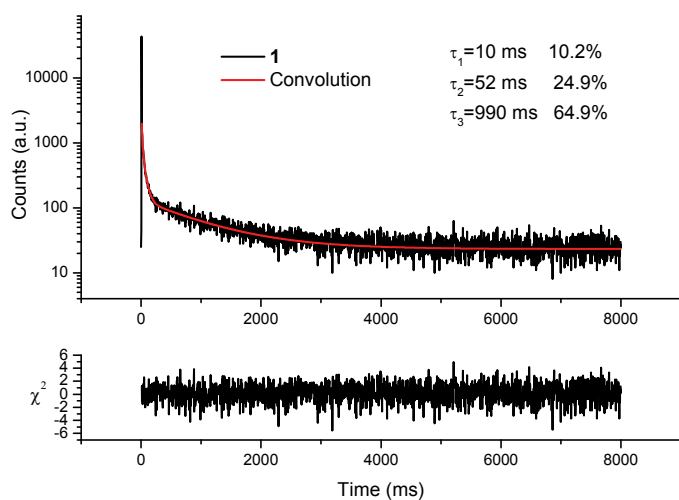

**Figure S12b** Fluorescence decay of **1** (crystals) at 298 K, black line ( $\lambda_{\text{exc}}$  360 nm;  $\lambda_{\text{em}}$  570 nm) and convolution fit (red line). Weighted residuals ( $\chi^2$ ) are shown under the decay curves.

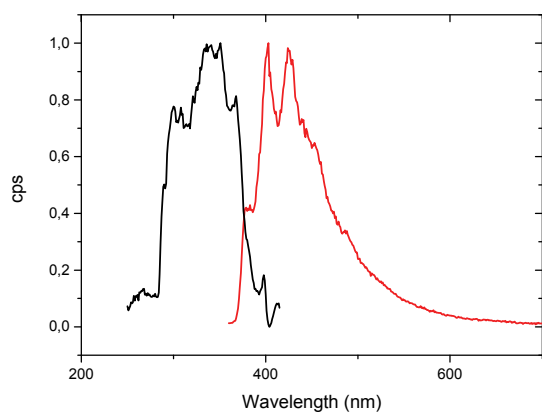

**Figure S12c** Emission and excitation spectra of **1** (crystals) at 77 K, red and black line respectively.

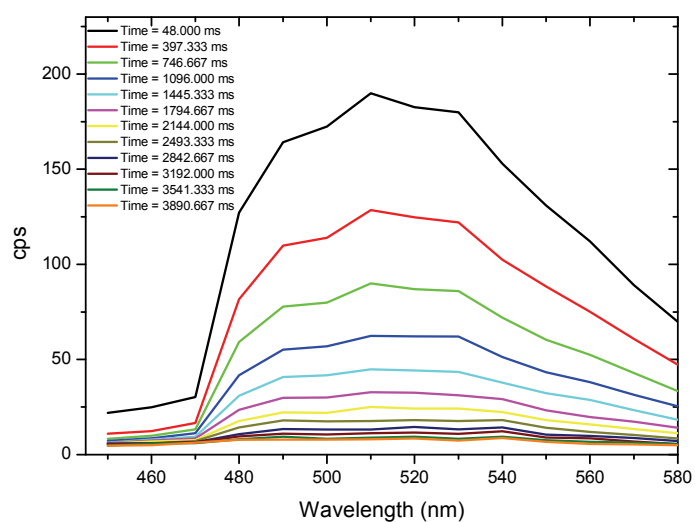

**Figure S12d** Emission spectra of **1** (crystals) at 77 K recorded at different time delays ( $\lambda_{\text{exc}}$ =350 nm).

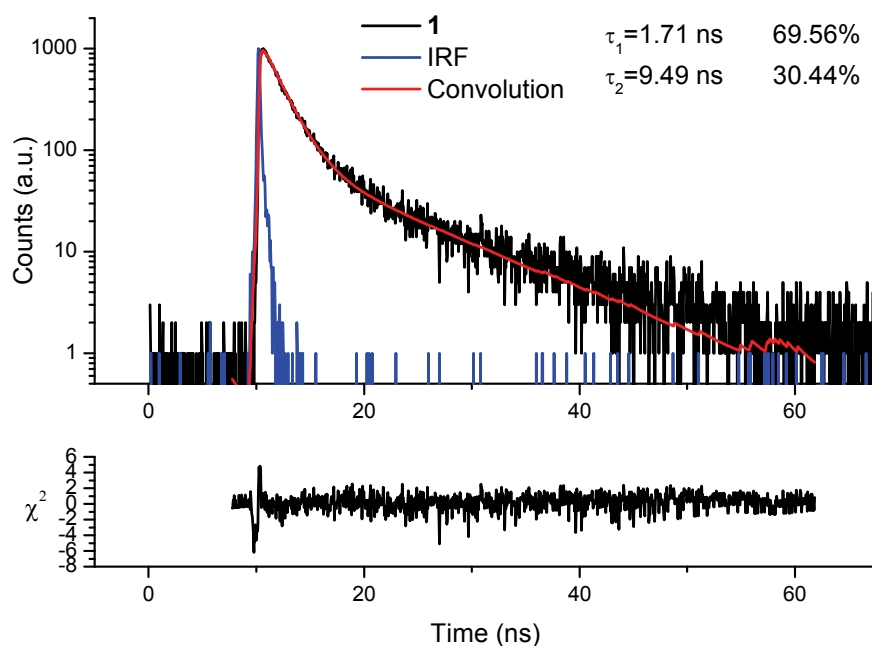

**Figure S12e** Fluorescence decay of **1** (crystals) at 77 K, black line ( $\lambda_{\text{exc}}$  375 nm;  $\lambda_{\text{em}}$  420 nm), IRF (Instrument Response Function), blue line and convolution fit (red line). Weighted residuals ( $\chi^2$ ) are shown under the decay curves.

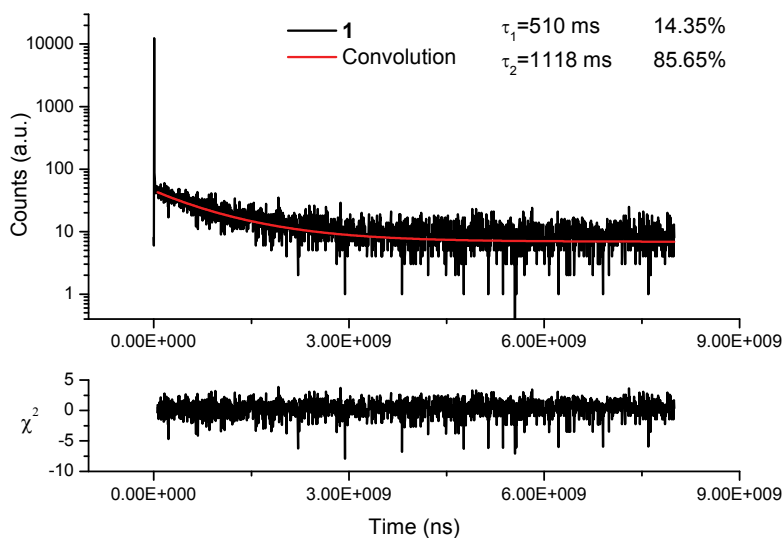

**Figure S12f** Fluorescence decay of **1** (crystals) at 77 K, black line ( $\lambda_{\text{exc}}$  350 nm;  $\lambda_{\text{em}}$  540 nm) and convolution fit (red line). Weighted residuals ( $\chi^2$ ) are shown under the decay curves.

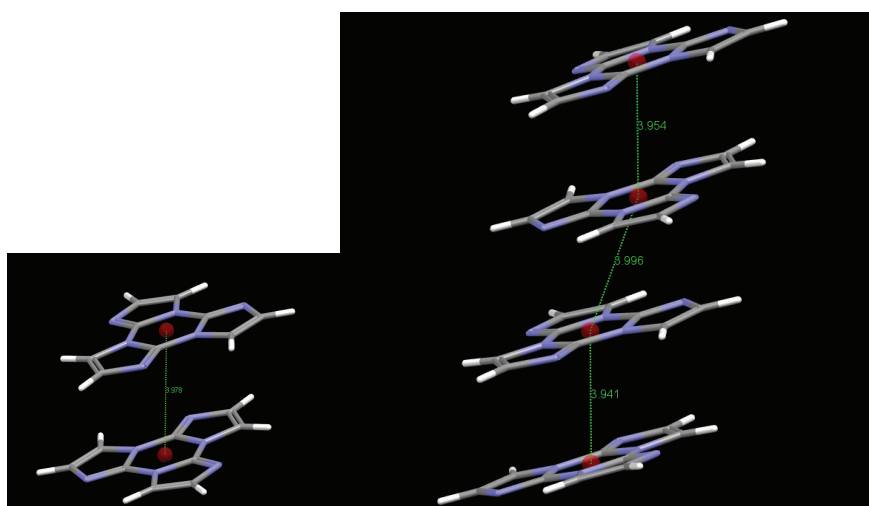

**Figure S13**  $\omega$ B97X/6-311++G(d,p) optimized structures of the dimer and tetramer of **1** with distances (in Å) between centroids of the central 6-membered rings.

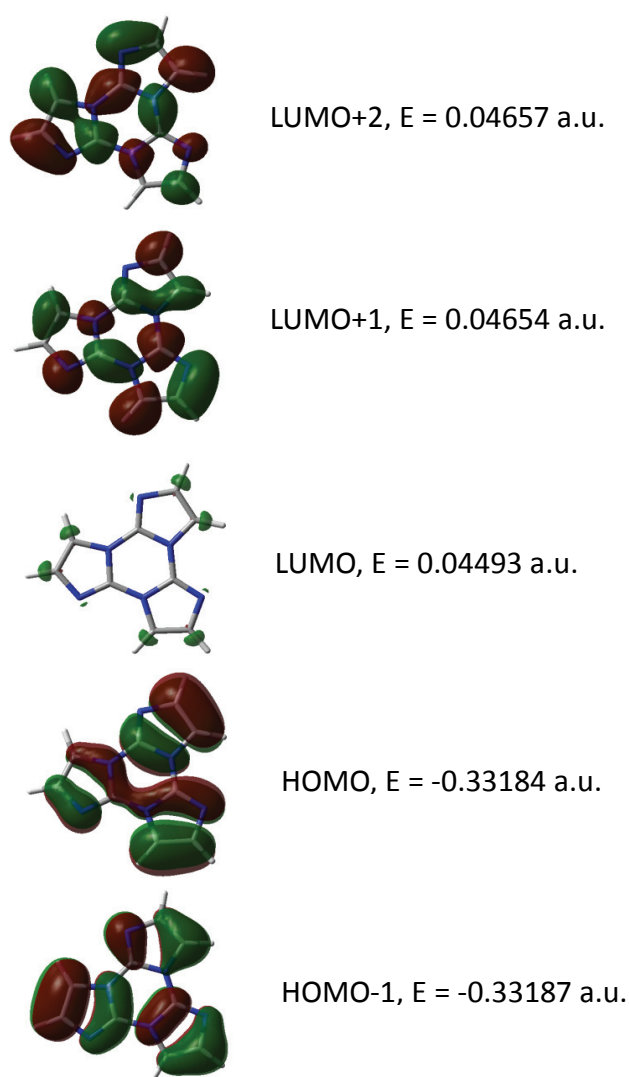

**Figure S14a** Isodensity surface plot of the frontier orbitals of compound **1** (isosurface values: 0.02, energies in a.u.).

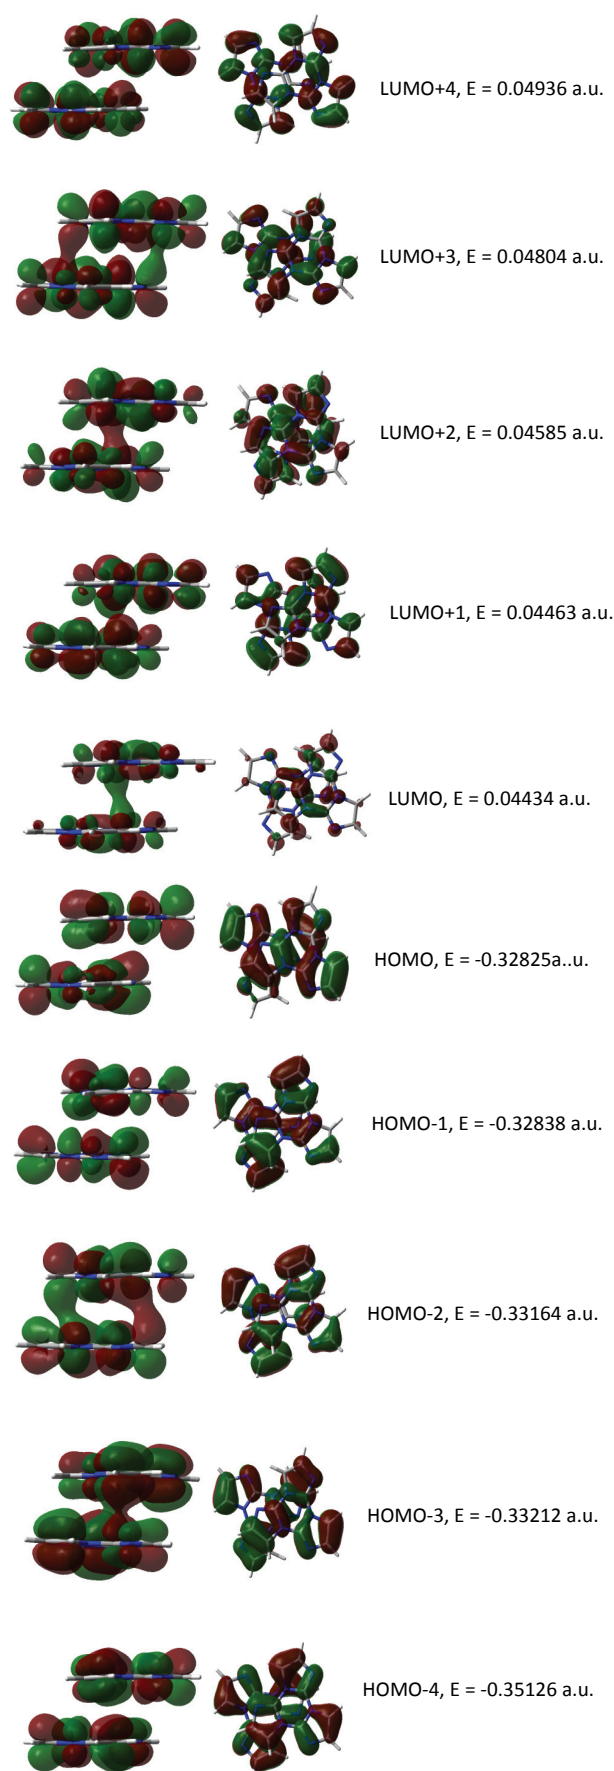

**Figure S14b** Isodensity surface plot of the frontier orbitals of dimer of compound **1** (isosurface values: 0.02).

**Table S1.** TD- $\omega$ B97X/6-311++G(d,p)  $S_0 \rightarrow S_1$  and  $S_0 \rightarrow T_n$  ( $n=1,6$ ) transitions computed on the optimized structure of **1**.

Excitation energies and oscillator strengths:

|               |    |           |           |           |          |              |
|---------------|----|-----------|-----------|-----------|----------|--------------|
| Excited State | 1: | Triplet-A | 3.8780 eV | 319.72 nm | f=0.0000 | <S**2>=2.000 |
| 45 -> 62      |    | 0.11041   |           |           |          |              |
| 50 -> 53      |    | 0.21348   |           |           |          |              |
| 50 -> 54      |    | 0.39873   |           |           |          |              |
| 51 -> 53      |    | 0.40157   |           |           |          |              |
| 51 -> 54      |    | -0.21388  |           |           |          |              |
| Excited State | 2: | Triplet-A | 4.1222 eV | 300.77 nm | f=0.0000 | <S**2>=2.000 |
| 45 -> 53      |    | -0.11456  |           |           |          |              |
| 49 -> 53      |    | -0.28646  |           |           |          |              |
| 49 -> 54      |    | 0.20449   |           |           |          |              |
| 50 -> 53      |    | 0.28973   |           |           |          |              |
| 50 -> 54      |    | -0.18688  |           |           |          |              |
| 51 -> 53      |    | 0.18538   |           |           |          |              |
| 51 -> 54      |    | 0.29034   |           |           |          |              |
| 51 -> 61      |    | 0.14956   |           |           |          |              |
| 51 -> 62      |    | -0.16955  |           |           |          |              |
| 51 -> 88      |    | -0.10417  |           |           |          |              |
| Excited State | 3: | Triplet-A | 4.1235 eV | 300.68 nm | f=0.0000 | <S**2>=2.000 |
| 45 -> 54      |    | 0.11443   |           |           |          |              |
| 49 -> 53      |    | 0.20527   |           |           |          |              |
| 49 -> 54      |    | 0.28656   |           |           |          |              |
| 50 -> 53      |    | 0.18683   |           |           |          |              |
| 50 -> 54      |    | 0.29103   |           |           |          |              |
| 50 -> 61      |    | -0.14991  |           |           |          |              |
| 50 -> 62      |    | 0.16949   |           |           |          |              |
| 50 -> 88      |    | 0.10419   |           |           |          |              |
| 51 -> 53      |    | -0.28814  |           |           |          |              |
| 51 -> 54      |    | 0.18559   |           |           |          |              |
| Excited State | 4: | Triplet-A | 5.1071 eV | 242.77 nm | f=0.0000 | <S**2>=2.000 |
| 49 -> 61      |    | -0.13408  |           |           |          |              |
| 49 -> 62      |    | 0.20221   |           |           |          |              |
| 50 -> 53      |    | -0.38760  |           |           |          |              |
| 50 -> 54      |    | 0.12799   |           |           |          |              |
| 50 -> 68      |    | -0.11832  |           |           |          |              |
| 51 -> 53      |    | 0.12887   |           |           |          |              |
| 51 -> 54      |    | 0.38994   |           |           |          |              |
| 51 -> 69      |    | -0.11957  |           |           |          |              |
| Excited State | 5: | Triplet-A | 5.1847 eV | 239.13 nm | f=0.0000 | <S**2>=2.000 |
| 45 -> 54      |    | -0.12671  |           |           |          |              |
| 49 -> 53      |    | 0.25710   |           |           |          |              |
| 49 -> 54      |    | 0.26449   |           |           |          |              |
| 49 -> 64      |    | 0.10993   |           |           |          |              |
| 49 -> 69      |    | -0.12645  |           |           |          |              |
| 50 -> 54      |    | -0.20586  |           |           |          |              |
| 51 -> 53      |    | 0.20489   |           |           |          |              |
| 51 -> 61      |    | -0.17181  |           |           |          |              |
| 51 -> 62      |    | 0.23138   |           |           |          |              |
| Excited State | 6: | Triplet-A | 5.1853 eV | 239.11 nm | f=0.0000 | <S**2>=2.000 |
| 45 -> 53      |    | 0.12660   |           |           |          |              |
| 49 -> 53      |    | -0.26496  |           |           |          |              |
| 49 -> 54      |    | 0.25732   |           |           |          |              |
| 49 -> 63      |    | 0.10997   |           |           |          |              |
| 49 -> 68      |    | -0.12692  |           |           |          |              |
| 50 -> 53      |    | -0.20662  |           |           |          |              |
| 50 -> 61      |    | -0.17165  |           |           |          |              |
| 50 -> 62      |    | 0.23132   |           |           |          |              |
| 51 -> 54      |    | -0.20320  |           |           |          |              |
| Excited State | 7: | Singlet-A | 5.4496 eV | 227.51 nm | f=0.0000 | <S**2>=0.000 |
| 50 -> 53      |    | -0.36890  |           |           |          |              |
| 50 -> 54      |    | -0.31584  |           |           |          |              |
| 51 -> 53      |    | -0.31666  |           |           |          |              |
| 51 -> 54      |    | 0.36915   |           |           |          |              |

**Table S2.** TD- $\omega$ B97X/6-311++G(d,p)  $S_0 \rightarrow S_1$ ,  $S_0 \rightarrow S_1'$  and  $S_0 \rightarrow T_n$  (n=1,12) transitions computed on the optimized dimeric structure of **1**.

Excitation energies and oscillator strengths:

|               |    |           |           |           |          |              |
|---------------|----|-----------|-----------|-----------|----------|--------------|
| Excited State | 1: | Triplet-A | 3.8720 eV | 320.21 nm | f=0.0000 | <S**2>=2.000 |
| 99 ->106      |    | -0.29152  |           |           |          |              |
| 100 ->103     |    | -0.12764  |           |           |          |              |
| 100 ->105     |    | 0.17854   |           |           |          |              |
| 100 ->107     |    | -0.22004  |           |           |          |              |
| 101 ->104     |    | 0.31838   |           |           |          |              |
| 102 ->105     |    | -0.18964  |           |           |          |              |
| 102 ->107     |    | -0.22285  |           |           |          |              |
|               |    |           |           |           |          |              |
| Excited State | 2: | Triplet-A | 3.8775 eV | 319.75 nm | f=0.0000 | <S**2>=2.000 |
| 99 ->103      |    | -0.12557  |           |           |          |              |
| 99 ->105      |    | 0.23145   |           |           |          |              |
| 99 ->107      |    | 0.14556   |           |           |          |              |
| 100 ->104     |    | 0.29656   |           |           |          |              |
| 101 ->105     |    | 0.11631   |           |           |          |              |
| 101 ->107     |    | -0.28027  |           |           |          |              |
| 102 ->106     |    | 0.28831   |           |           |          |              |
|               |    |           |           |           |          |              |
| Excited State | 3: | Triplet-A | 4.1072 eV | 301.87 nm | f=0.0000 | <S**2>=2.000 |
| 97 ->104      |    | -0.15723  |           |           |          |              |
| 97 ->106      |    | -0.12797  |           |           |          |              |
| 98 ->107      |    | -0.25458  |           |           |          |              |
| 99 ->104      |    | 0.19096   |           |           |          |              |
| 99 ->106      |    | 0.16082   |           |           |          |              |
| 100 ->103     |    | -0.11288  |           |           |          |              |
| 100 ->105     |    | 0.17134   |           |           |          |              |
| 101 ->104     |    | 0.16603   |           |           |          |              |
| 101 ->106     |    | -0.16025  |           |           |          |              |
| 101 ->121     |    | 0.12980   |           |           |          |              |
| 102 ->105     |    | 0.13244   |           |           |          |              |
| 102 ->107     |    | 0.19790   |           |           |          |              |
|               |    |           |           |           |          |              |
| Excited State | 4: | Triplet-A | 4.1080 eV | 301.81 nm | f=0.0000 | <S**2>=2.000 |
| 97 ->107      |    | -0.20500  |           |           |          |              |
| 98 ->104      |    | -0.24314  |           |           |          |              |
| 99 ->107      |    | 0.23593   |           |           |          |              |
| 100 ->104     |    | -0.18509  |           |           |          |              |
| 100 ->121     |    | -0.11406  |           |           |          |              |
| 101 ->103     |    | 0.12895   |           |           |          |              |
| 101 ->105     |    | -0.19242  |           |           |          |              |
| 101 ->107     |    | 0.10660   |           |           |          |              |
| 101 ->119     |    | 0.11298   |           |           |          |              |
| 102 ->106     |    | 0.21946   |           |           |          |              |
|               |    |           |           |           |          |              |
| Excited State | 5: | Triplet-A | 4.1222 eV | 300.77 nm | f=0.0000 | <S**2>=2.000 |
| 97 ->103      |    | -0.12361  |           |           |          |              |
| 97 ->105      |    | 0.21272   |           |           |          |              |
| 98 ->104      |    | -0.10808  |           |           |          |              |
| 98 ->106      |    | 0.21706   |           |           |          |              |
| 99 ->105      |    | 0.14429   |           |           |          |              |
| 99 ->119      |    | 0.13221   |           |           |          |              |
| 100 ->106     |    | -0.25467  |           |           |          |              |
| 101 ->107     |    | 0.19861   |           |           |          |              |
| 102 ->104     |    | -0.22801  |           |           |          |              |
| 102 ->106     |    | 0.11469   |           |           |          |              |
| 102 ->121     |    | 0.10713   |           |           |          |              |
|               |    |           |           |           |          |              |
| Excited State | 6: | Triplet-A | 4.1288 eV | 300.29 nm | f=0.0000 | <S**2>=2.000 |
| 97 ->104      |    | 0.14170   |           |           |          |              |
| 97 ->106      |    | -0.20127  |           |           |          |              |
| 98 ->103      |    | 0.13072   |           |           |          |              |
| 98 ->105      |    | -0.21140  |           |           |          |              |
| 99 ->104      |    | 0.14191   |           |           |          |              |
| 99 ->106      |    | -0.16047  |           |           |          |              |
| 100 ->105     |    | 0.15006   |           |           |          |              |
| 100 ->107     |    | 0.18750   |           |           |          |              |
| 101 ->104     |    | -0.16493  |           |           |          |              |
| 101 ->106     |    | -0.14112  |           |           |          |              |
| 102 ->103     |    | 0.11982   |           |           |          |              |
| 102 ->105     |    | -0.18864  |           |           |          |              |
| 102 ->107     |    | 0.10807   |           |           |          |              |
| 102 ->119     |    | -0.11409  |           |           |          |              |



|               |     |           |           |           |          |              |
|---------------|-----|-----------|-----------|-----------|----------|--------------|
| Excited State | 7:  | Triplet-A | 5.0701 eV | 244.54 nm | f=0.0000 | <S**2>=2.000 |
| 97 ->121      |     | 0.12730   |           |           |          |              |
| 98 ->119      |     | 0.14040   |           |           |          |              |
| 99 ->104      |     | 0.26498   |           |           |          |              |
| 100 ->105     |     | -0.12380  |           |           |          |              |
| 100 ->107     |     | -0.21893  |           |           |          |              |
| 101 ->106     |     | 0.26514   |           |           |          |              |
| 102 ->103     |     | 0.14362   |           |           |          |              |
| 102 ->105     |     | -0.21129  |           |           |          |              |
| 102 ->107     |     | 0.17105   |           |           |          |              |
|               |     |           |           |           |          |              |
| Excited State | 8:  | Triplet-A | 5.0738 eV | 244.36 nm | f=0.0000 | <S**2>=2.000 |
| 97 ->119      |     | 0.12654   |           |           |          |              |
| 98 ->121      |     | 0.13734   |           |           |          |              |
| 99 ->103      |     | 0.11222   |           |           |          |              |
| 99 ->105      |     | -0.15551  |           |           |          |              |
| 99 ->107      |     | 0.20307   |           |           |          |              |
| 100 ->104     |     | -0.11797  |           |           |          |              |
| 100 ->106     |     | -0.23394  |           |           |          |              |
| 101 ->103     |     | -0.10601  |           |           |          |              |
| 101 ->105     |     | 0.19360   |           |           |          |              |
| 101 ->107     |     | 0.15537   |           |           |          |              |
| 102 ->104     |     | 0.25436   |           |           |          |              |
| 102 ->106     |     | -0.13897  |           |           |          |              |
| 102 ->133     |     | -0.10319  |           |           |          |              |
|               |     |           |           |           |          |              |
| Excited State | 9:  | Triplet-A | 5.1553 eV | 240.50 nm | f=0.0000 | <S**2>=2.000 |
| 97 ->105      |     | 0.15613   |           |           |          |              |
| 97 ->107      |     | 0.14954   |           |           |          |              |
| 98 ->106      |     | 0.26611   |           |           |          |              |
| 99 ->105      |     | -0.14856  |           |           |          |              |
| 100 ->106     |     | 0.10558   |           |           |          |              |
| 100 ->118     |     | 0.10225   |           |           |          |              |
| 100 ->121     |     | -0.15540  |           |           |          |              |
| 101 ->107     |     | -0.16450  |           |           |          |              |
| 101 ->119     |     | 0.17850   |           |           |          |              |
| 101 ->122     |     | -0.13112  |           |           |          |              |
| 102 ->104     |     | 0.10005   |           |           |          |              |
|               |     |           |           |           |          |              |
| Excited State | 10: | Triplet-A | 5.1567 eV | 240.43 nm | f=0.0000 | <S**2>=2.000 |
| 97 ->106      |     | 0.21790   |           |           |          |              |
| 98 ->103      |     | -0.13775  |           |           |          |              |
| 98 ->105      |     | 0.23357   |           |           |          |              |
| 99 ->106      |     | -0.16639  |           |           |          |              |
| 100 ->107     |     | 0.16125   |           |           |          |              |
| 100 ->119     |     | -0.13927  |           |           |          |              |
| 100 ->122     |     | 0.10523   |           |           |          |              |
| 101 ->104     |     | -0.13687  |           |           |          |              |
| 101 ->118     |     | -0.10846  |           |           |          |              |
| 101 ->121     |     | 0.15244   |           |           |          |              |
| 101 ->129     |     | -0.11287  |           |           |          |              |
| 102 ->119     |     | -0.10762  |           |           |          |              |
|               |     |           |           |           |          |              |
| Excited State | 11: | Triplet-A | 5.1650 eV | 240.05 nm | f=0.0000 | <S**2>=2.000 |
| 97 ->104      |     | 0.23744   |           |           |          |              |
| 98 ->107      |     | 0.23983   |           |           |          |              |
| 99 ->120      |     | -0.10213  |           |           |          |              |
| 99 ->121      |     | 0.16363   |           |           |          |              |
| 100 ->105     |     | 0.14833   |           |           |          |              |
| 100 ->127     |     | 0.10522   |           |           |          |              |
| 101 ->106     |     | -0.15662  |           |           |          |              |
| 102 ->107     |     | 0.13738   |           |           |          |              |
| 102 ->119     |     | 0.13643   |           |           |          |              |
| 102 ->131     |     | -0.10299  |           |           |          |              |
|               |     |           |           |           |          |              |
| Excited State | 12: | Triplet-A | 5.1684 eV | 239.89 nm | f=0.0000 | <S**2>=2.000 |
| 97 ->105      |     | -0.12279  |           |           |          |              |
| 97 ->107      |     | 0.20371   |           |           |          |              |
| 98 ->104      |     | 0.24449   |           |           |          |              |
| 99 ->107      |     | 0.12059   |           |           |          |              |
| 99 ->119      |     | 0.15723   |           |           |          |              |
| 99 ->122      |     | -0.10363  |           |           |          |              |
| 100 ->104     |     | -0.14698  |           |           |          |              |
| 101 ->105     |     | -0.12223  |           |           |          |              |
| 102 ->106     |     | 0.14363   |           |           |          |              |
| 102 ->120     |     | -0.11910  |           |           |          |              |
| 102 ->121     |     | 0.16827   |           |           |          |              |

|               |       |           |           |           |          |              |
|---------------|-------|-----------|-----------|-----------|----------|--------------|
| Excited State | 13:   | Singlet-A | 5.4214 eV | 228.70 nm | f=0.0007 | <S**2>=0.000 |
| 99            | ->104 | 0.12636   |           |           |          |              |
| 99            | ->106 | -0.28745  |           |           |          |              |
| 100           | ->105 | 0.11535   |           |           |          |              |
| 100           | ->107 | -0.28471  |           |           |          |              |
| 101           | ->104 | 0.30390   |           |           |          |              |
| 101           | ->106 | 0.12286   |           |           |          |              |
| 102           | ->103 | 0.16050   |           |           |          |              |
| 102           | ->105 | -0.28877  |           |           |          |              |
| 102           | ->107 | -0.14076  |           |           |          |              |
| Excited State | 14:   | Singlet-A | 5.4406 eV | 227.89 nm | f=0.0000 | <S**2>=0.000 |
| 99            | ->103 | -0.17051  |           |           |          |              |
| 99            | ->105 | 0.28684   |           |           |          |              |
| 100           | ->104 | 0.33394   |           |           |          |              |
| 101           | ->107 | -0.32340  |           |           |          |              |
| 102           | ->106 | 0.32583   |           |           |          |              |

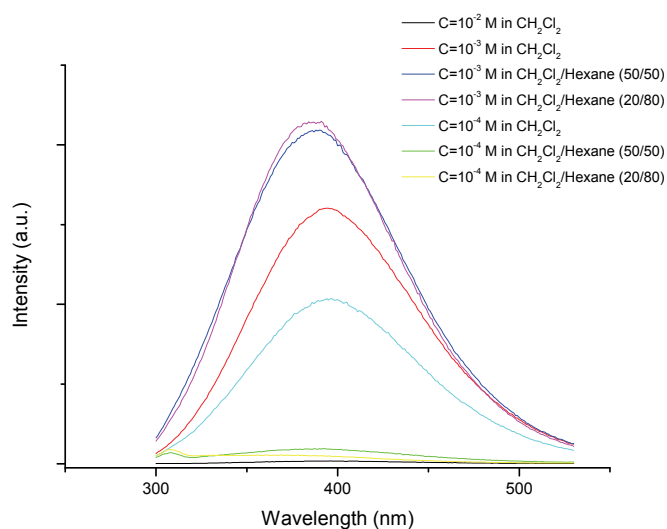

**Figure S15a** Emission spectra of **2** (DCM and DCM/hexane) at 298 K,  $\lambda_{\text{exc}}=280\text{nm}$ .

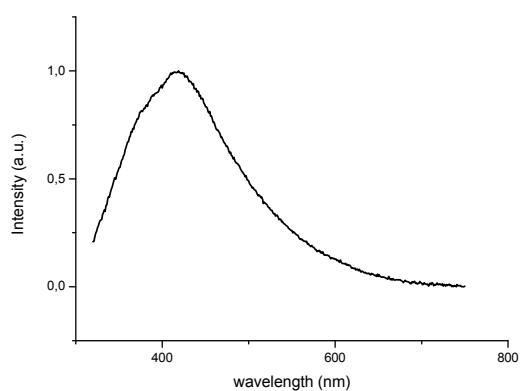

**Figure S15b** Emission spectrum of **2** (crystals) at 298 K,  $\lambda_{\text{exc}} 350 \text{ nm}$ .

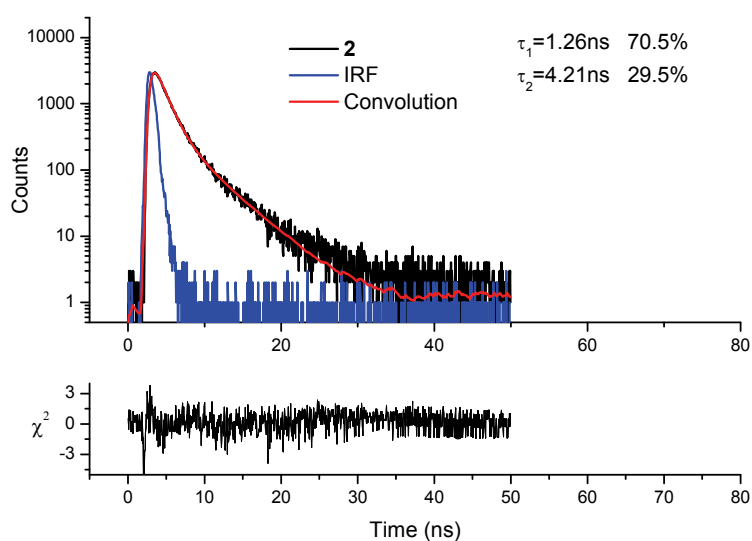

**Figure S16a** Fluorescence decay of **2** (crystals) at 298 K, black line ( $\lambda_{\text{exc}}$  300 nm;  $\lambda_{\text{em}}$  420 nm) Instrument response function (IRF) and convolution fit blue line and red line respectively. Weighted residuals ( $\chi^2$ ) are shown under the decay curves.

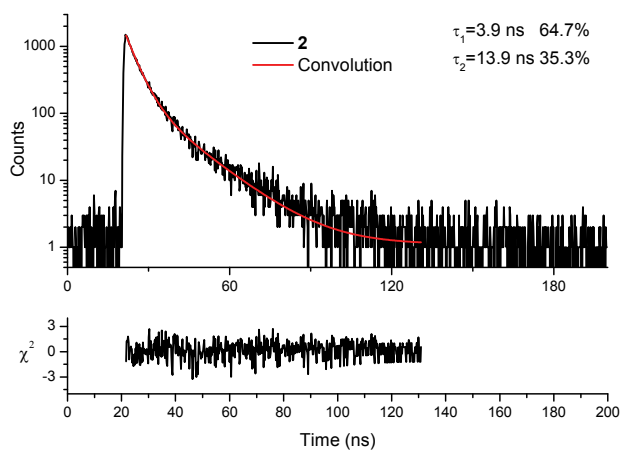

**Figure S16b** Fluorescence decay of **2** (crystals) at 298 K, black line ( $\lambda_{\text{exc}}$  300 nm;  $\lambda_{\text{em}}$  540 nm) and convolution fit (red line). Weighted residuals ( $\chi^2$ ) are shown under the decay curves.

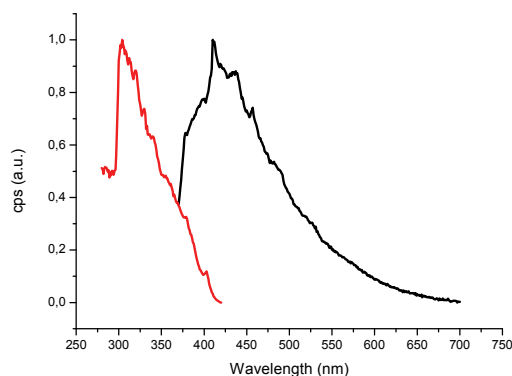

**Figure S17** Emission (black) and excitation (red) spectra **2** (crystals) at 77 K,  $\lambda_{\text{exc}}$  350 nm.

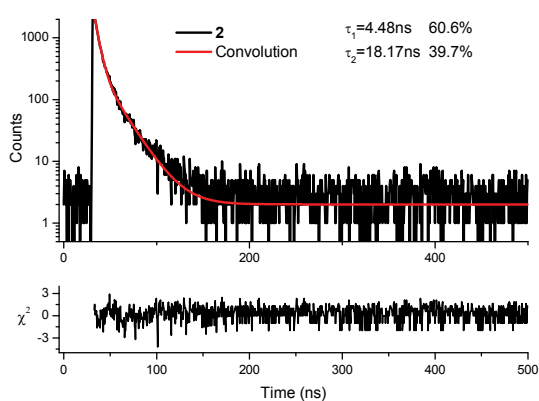

**Figure S18a** Fluorescence decay of **2** (crystals) at 77 K, black line ( $\lambda_{\text{exc}}$  300 nm;  $\lambda_{\text{em}}$  450 nm) and convolution fit (red line). Weighted residuals ( $\chi^2$ ) are shown under the decay curves.

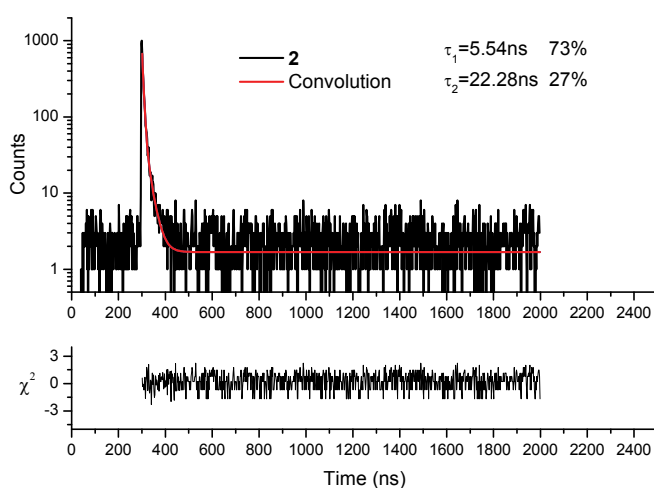

**Figure S18b** Fluorescence decay of **2** (crystals) at 77 K, black line ( $\lambda_{\text{exc}}$  300 nm;  $\lambda_{\text{em}}$  540 nm) and convolution fit (red line). Weighted residuals ( $\chi^2$ ) are shown under the decay curves.

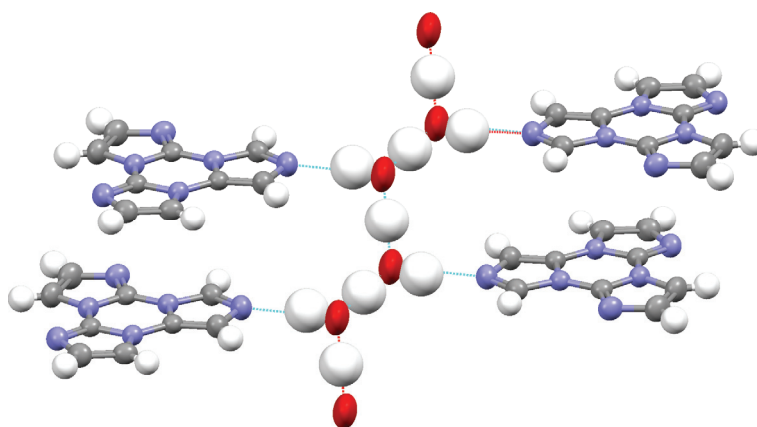

**Figure S19.** Ortep view down the crystallographic *b* axis showing four stacked molecules of **2** interacting *via* hydrogen bonds with a zig-zag chain of water molecules. Ellipsoids at 50% level of probability.

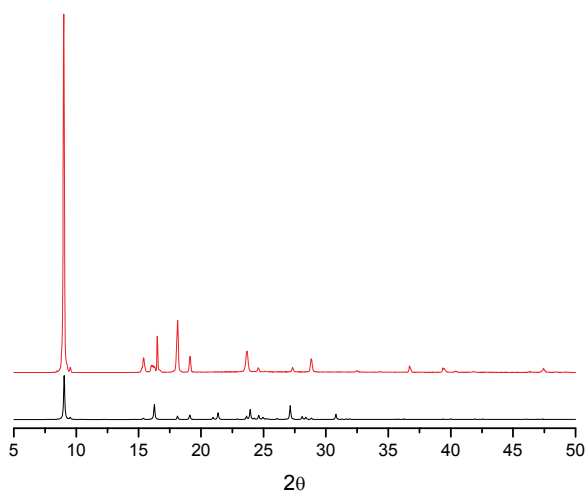

**Figure S20** XRPD for compound **2**: Calculated from crystal structure data (black line); experimental collected on gently ground single crystals (red line).

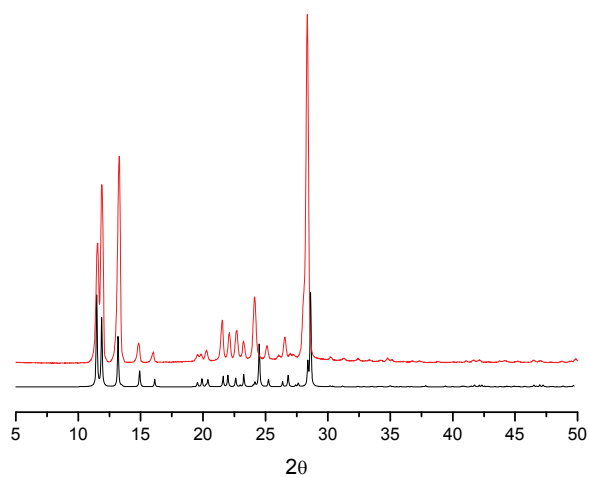

**Figure S21** XRPD for compound **1**: Calculated from crystal structure data (Refcode OSEXEQ) (black line); experimental collected on gently ground single crystals (red line).
